# Supplementary material
Source: publisher site journal article supplement (https://www.dovepress.com/article/334785)
Supplement: Supplementary file 1 [file get_supplementary_file.php]

Supplementary materials

Antisense *vicR*-loaded dendritic mesoporous silica nanoparticles regulate the biofilm organization and cariogenicity of *Streptococcus mutans*

**Western blot**

Western blot was performed to further prove the regulatory effect of DMSNs-NH2-ASvicR on *vicR* expression. The 24-hour biofilms of each group (sterile deionized water, naked pDL278, naked plasmid-AS*vicR*, DMSNs-NH2, or DMSNs-NH2-AS*vicR*) were obtained as in the biofilm formation assay. After being washed twice with PBS, the biofilms were harvested by a cell scraper and centrifuged (5000 rpm, 4ºC, 10 min) to obtain bacterial precipitation. Total protein was extracted using a gram-positive bacteria protein extraction kit (Bestbio, China), and the protein concentration of each group was measured with NanoDropOnec (Thermo Fisher, USA). Equal amounts of protein (300 μg) were mixed with 5 SDS-PAGE loading buffer (Beyotime, China), boiled for 10 min and loaded on precast 4-20%, gradient gels (Beyotime, China). Proteins were separated and transferred to 0.22-mm PVDF membranes (Millipore, USA). The membranes were blocked in 5 w/v% non-fat dry milk at room temperature for 2 h, then probed overnight with purified VicR-specific rabbit antibody diluted at 1:1000. Then, the membranes were washed, and incubated with goat anti-rabbit secondary antibody

conjugated with horse-radish peroxidase (dilution 1:10,000). Protein signals were

detected with the Immobilon Western Chemiluminescent HRP substrate kit (Millipore, USA). The image of protein band was obtained using a gel Imaging System (BioRad, USA).


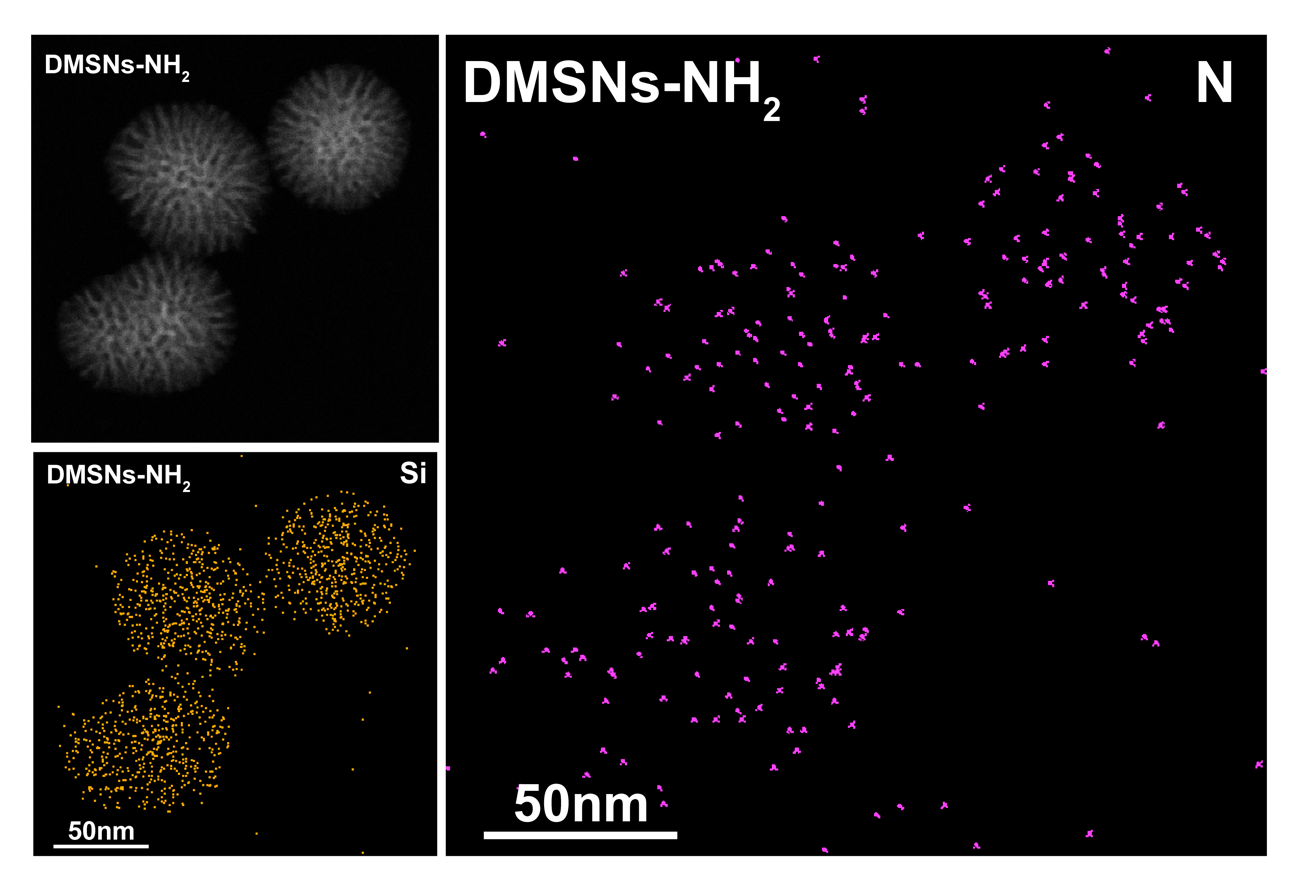


**Supplementary Figure 1:** the EDS-mapping image of DMSNs-NH2 shows that the DMSNs were successfully aminated. Si represents silicon in DMSNs-NH2 and N represents nitrogen in the amino group of DMSNs-NH2.

| Element | KeV | Mass% | Atom% |
| --- | --- | --- | --- |
| N | 0.392 | 13.91 | 24.48 |
| Si | 1.739 | 86.09 | 75.52 |
| Total |  | 100.00 | 100.00 |

**Supplementary Table 1:** The quantitative result of the EDS-mapping. The mass ratio of the N in the amino group to the Si in the nanoparticles was about 1:6.


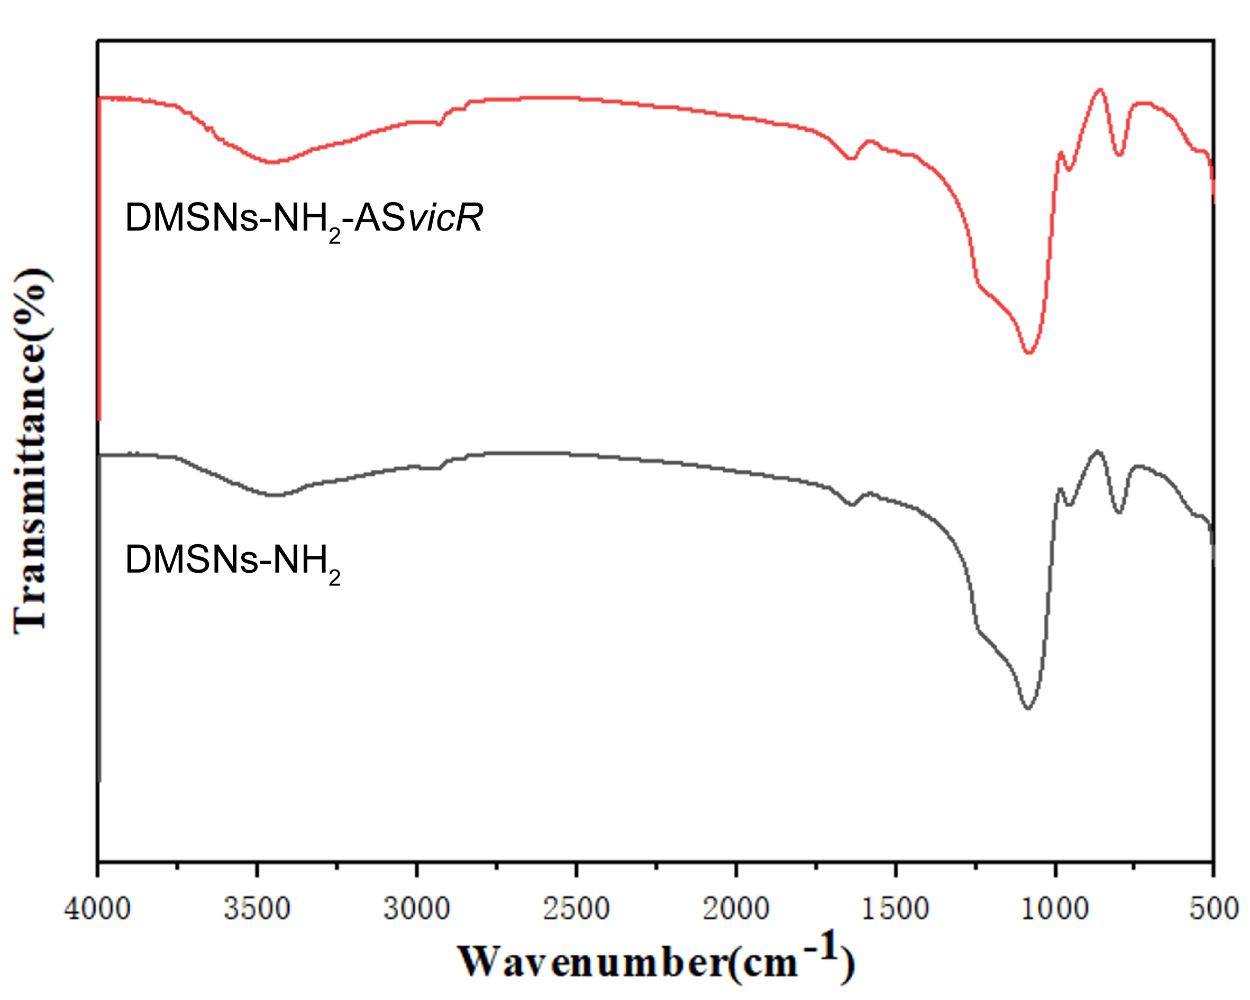


**Supplementary Figure 2**: the FTIR of DMSNs-NH2 and DMSNs-NH2-AS*vicR* do not show obvious differences, which was probably because there were no chemical bonds formed between DMSNs-NH2 and plasmid-AS*vicR*.


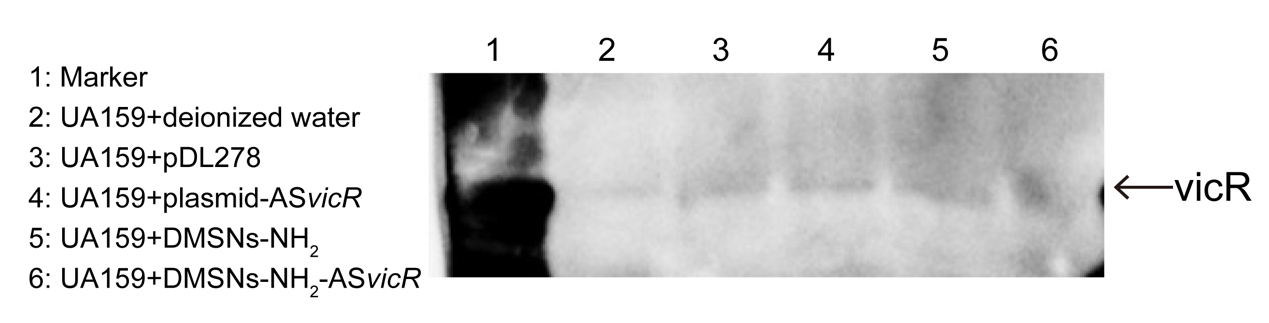


**Supplementary Figure 3**: Result of Western Blot shows that the band of vicR protein can be seen in each group except for the group of “UA159+DMSNs-NH2-AS*vicR*.
